# Supplementary material for: Structural insight into the intraflagellar transport complex IFT-A and its assembly in the anterograde IFT train
Source: PubMed Central journal article supplement (PMC10023715; doi:10.1038/s41467-023-37208-2), 2023-03-17
Supplement: 41467_2023_37208_MOESM1_ESM.pdf [file 41467_2023_37208_MOESM1_ESM.pdf]

## Supplementary Information

# Structural insight into the intraflagellar transport complex IFT-A and its assembly in the anterograde IFT train

Yuanyuan Ma<sup>1,2#</sup>, Jun He<sup>1,2#</sup>, Shaobai Li<sup>1,2</sup>, Deqiang Yao<sup>3</sup>, Chenhui Huang<sup>1,2</sup>,  
Jian Wu<sup>1,2\*</sup> and Ming Lei<sup>1,2,4\*</sup>

<sup>1</sup>Ninth People's Hospital, Shanghai Jiao Tong University School of Medicine, Shanghai 200011, China.

<sup>2</sup>Shanghai Institute of Precision Medicine, Shanghai 200125, China.

<sup>3</sup>Renji Hospital, Shanghai Jiao Tong University School of Medicine, Shanghai 200032, China.

<sup>4</sup>State Key Laboratory of Oncogenes and Related Genes, Shanghai Jiao Tong University School of Medicine, Shanghai 200025, China.

#These authors contributed equally to this work.

\*Correspondence: M.L. (leim@shsmu.edu.cn) and J.W. (wujian@shsmu.edu.cn)

## Supplementary Fig. 1

**a**

| Protein name | Uniprot Accession Number | MW(kDa) | Peptide spectrum matches | Unique peptides |
|--------------|--------------------------|---------|--------------------------|-----------------|
| IFT121       | Q22U89                   | 137.8   | 145                      | 74              |
| IFT139       | I7MFN3                   | 153.9   | 116                      | 67              |
| IFT144       | Q22BP2                   | 158.1   | 114                      | 65              |
| IFT140       | I7LVZ7                   | 161.4   | 101                      | 55              |
| IFT122       | Q244W3                   | 143.7   | 86                       | 55              |
| IFT43        | Q22NF5                   | 16.7    | 3                        | 3               |

**b**

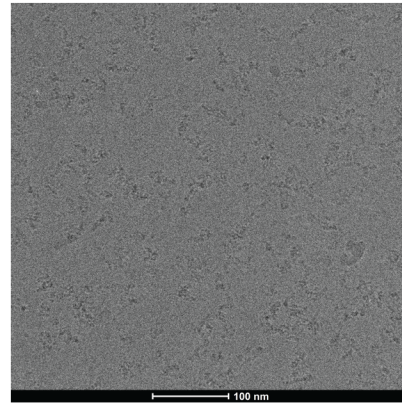

**Supplementary Fig. 1 | Biochemical and cryo-EM analyses of the purified IFT-A complex.** **a**, Mass spectrometry analysis of the purified IFT-A complex. **b**, A representative cryo-EM image of IFT-A. Each experiment was repeated three times independently with similar results. Source data are provided as a Source Data file.

# Supplementary Fig. 2

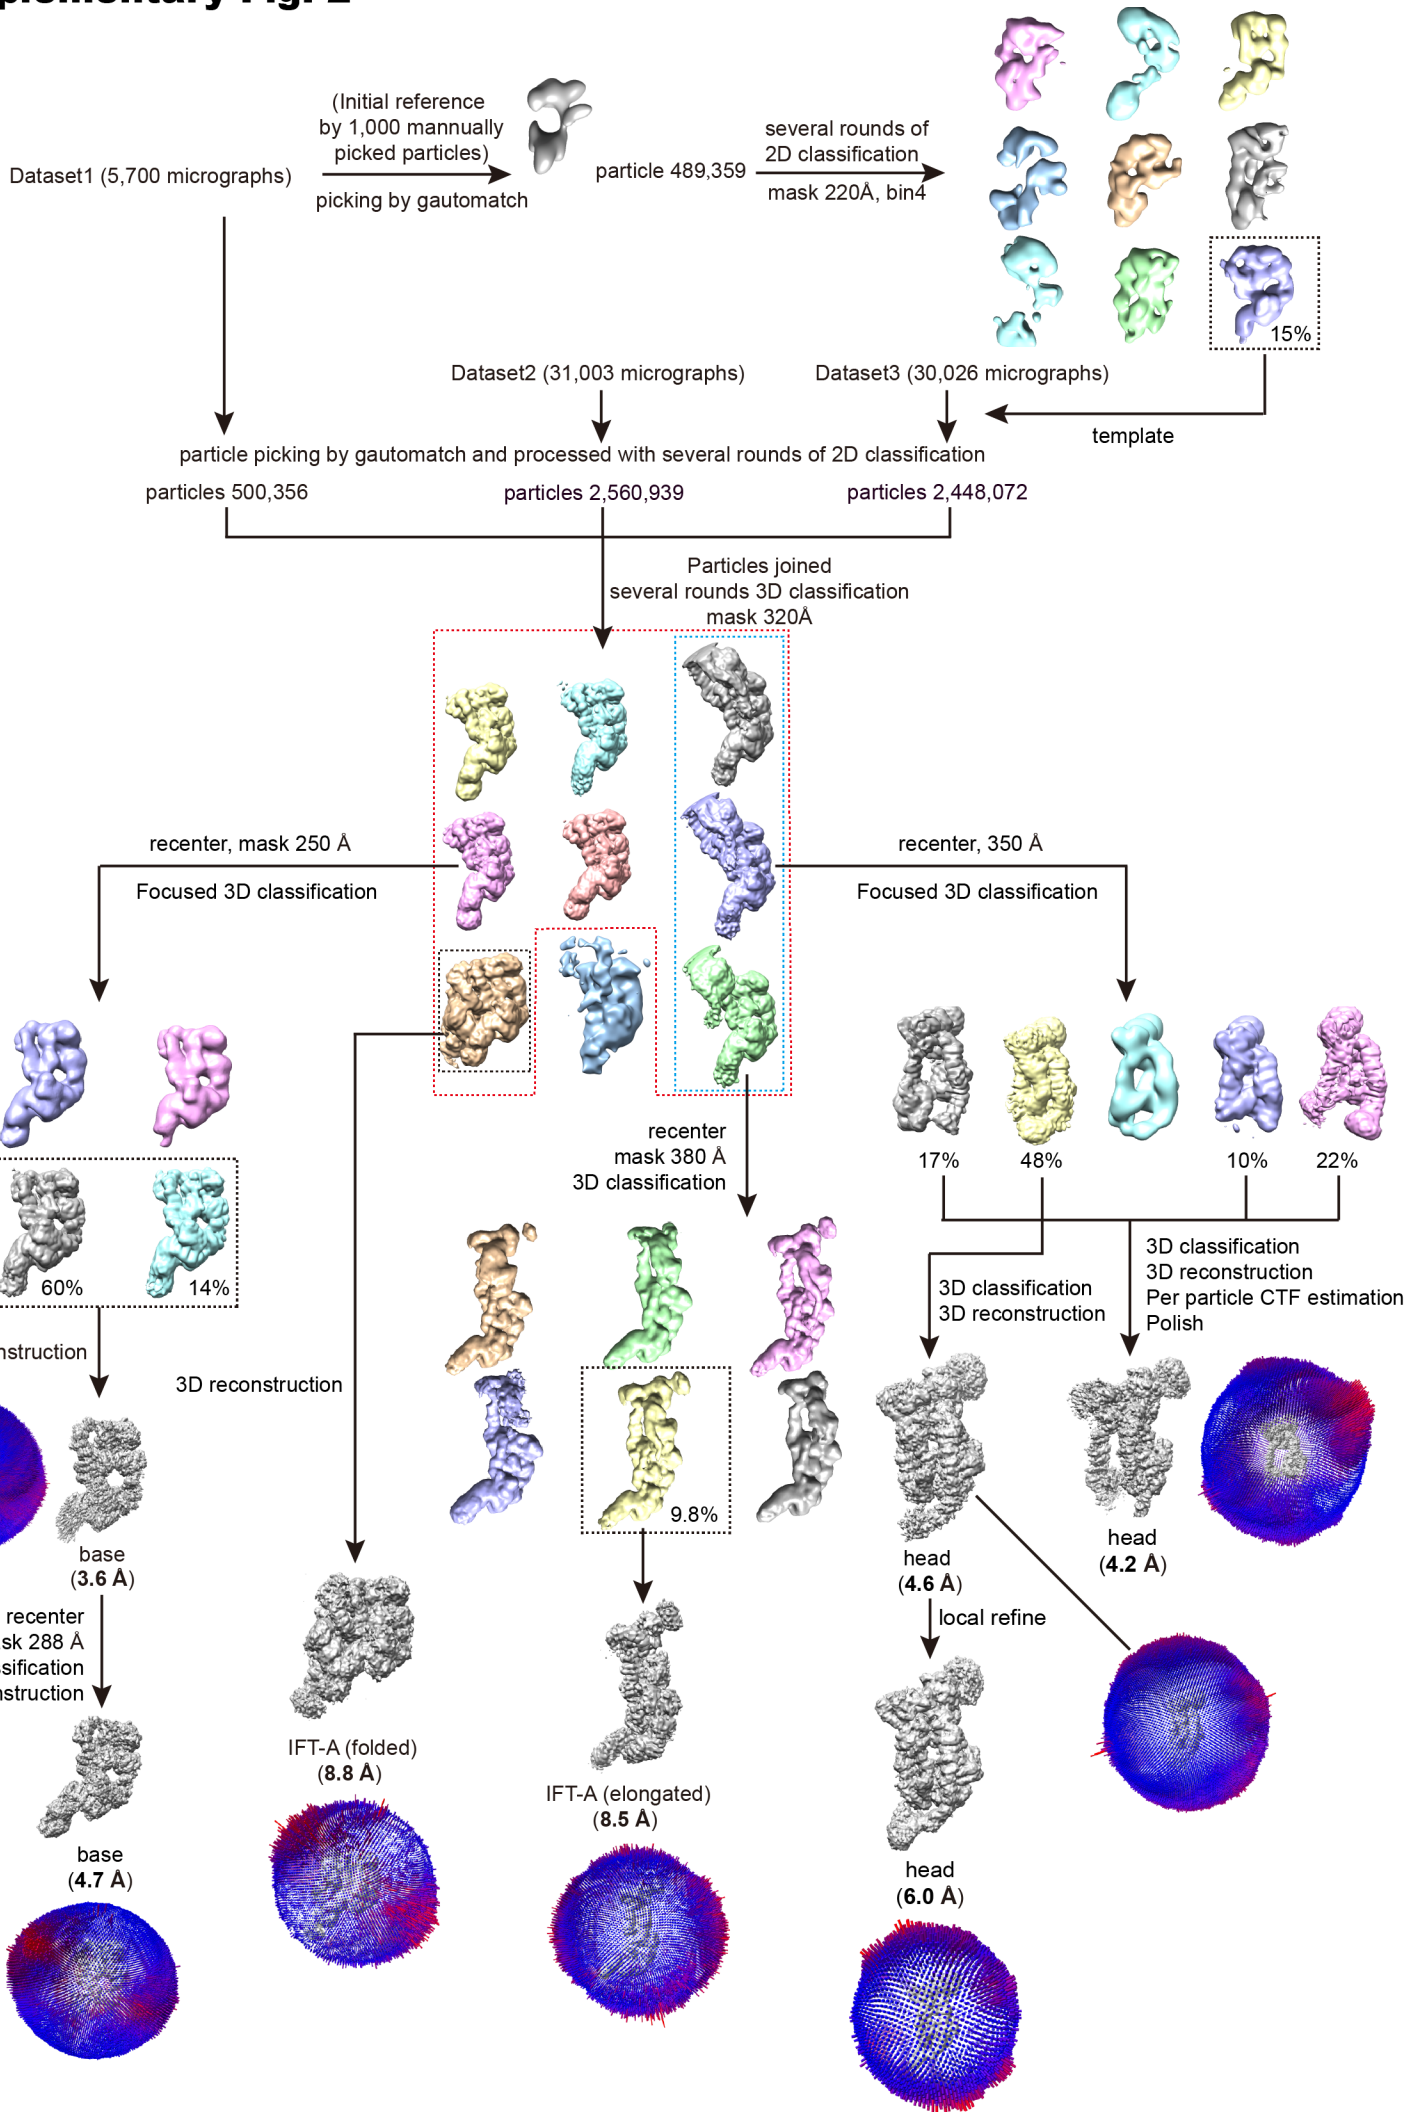



**Supplementary Fig. 2 | Structure determination of the IFT-A complex by cryo-EM.**

Cryo-Image processing flowchart, reconstruction of the IFT-A complex and angular distribution of reconstructed particles.

# Supplementary Fig. 3

**a**

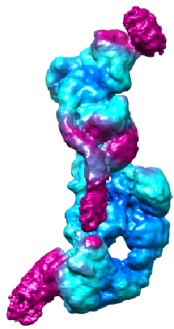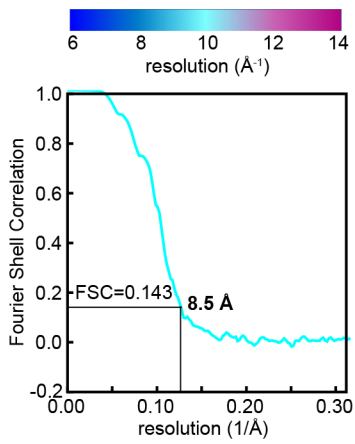

**b**

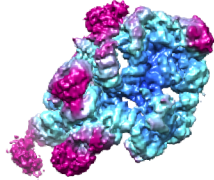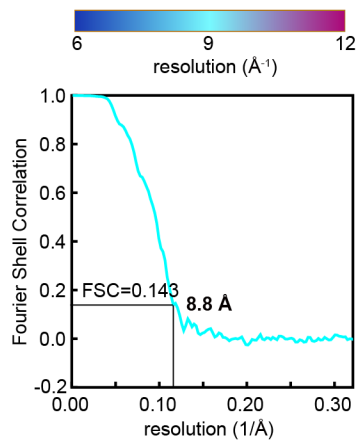

**c**

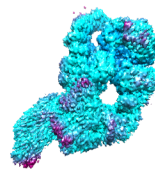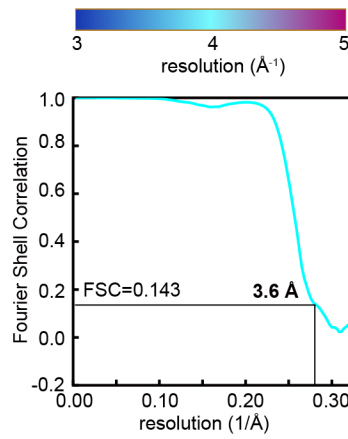

**d**

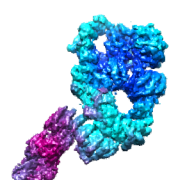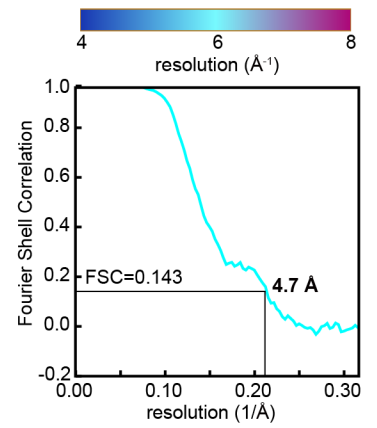

**e**

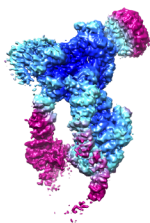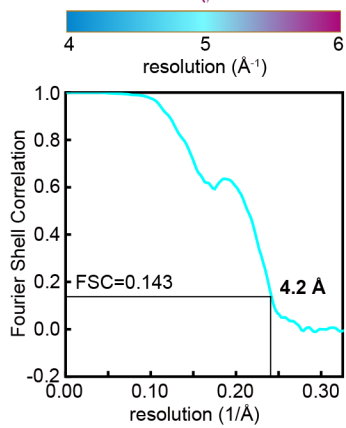

**f**

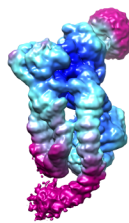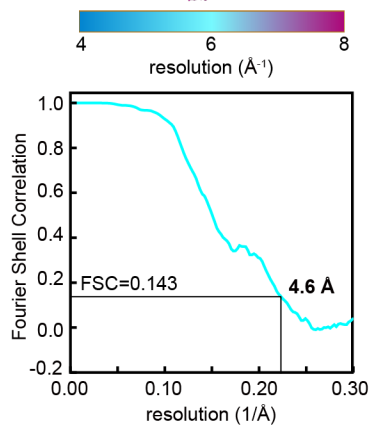

**g**

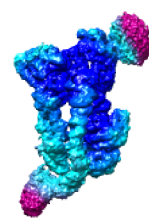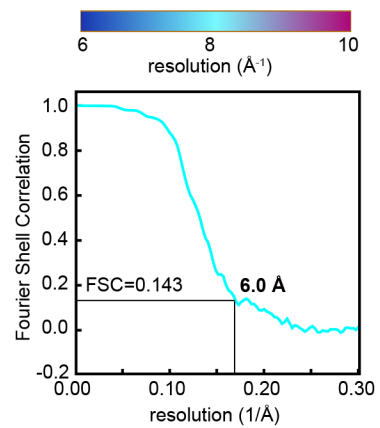

**Supplementary Fig. 3 | Local resolution estimation of IFT-A. a-g,** Local resolution maps and the corresponding Fourier Shell Correlation curves for IFT-A in elongated state (a), IFT-A in folded state (b), base module at 3.6 Å (c), base module at 4.7 Å (d), head module at 4.2 Å (e), head module at 4.6 Å (f) and head module at 6.0 Å (g).

# Supplementary Fig. 4

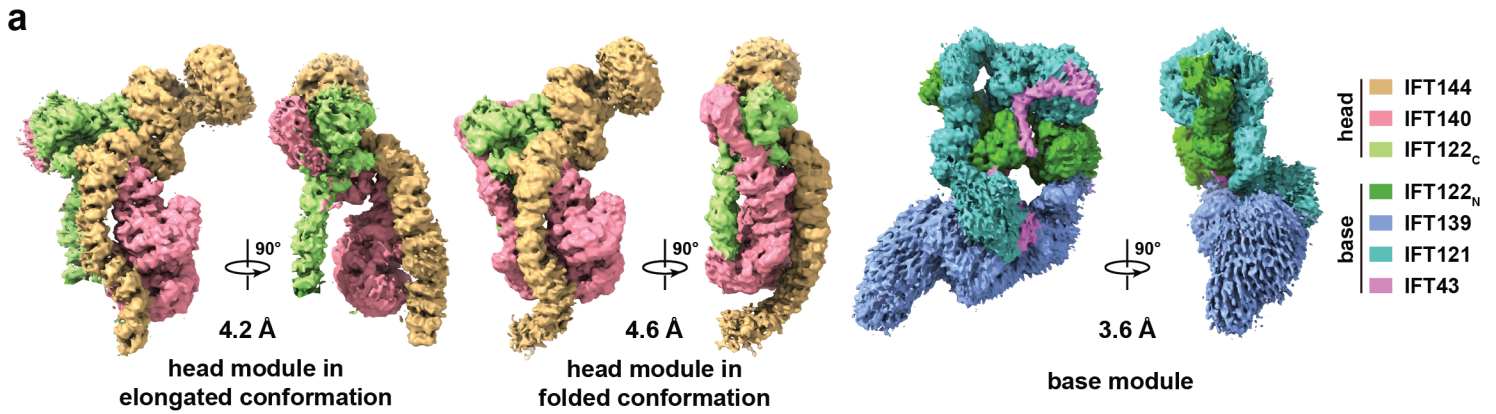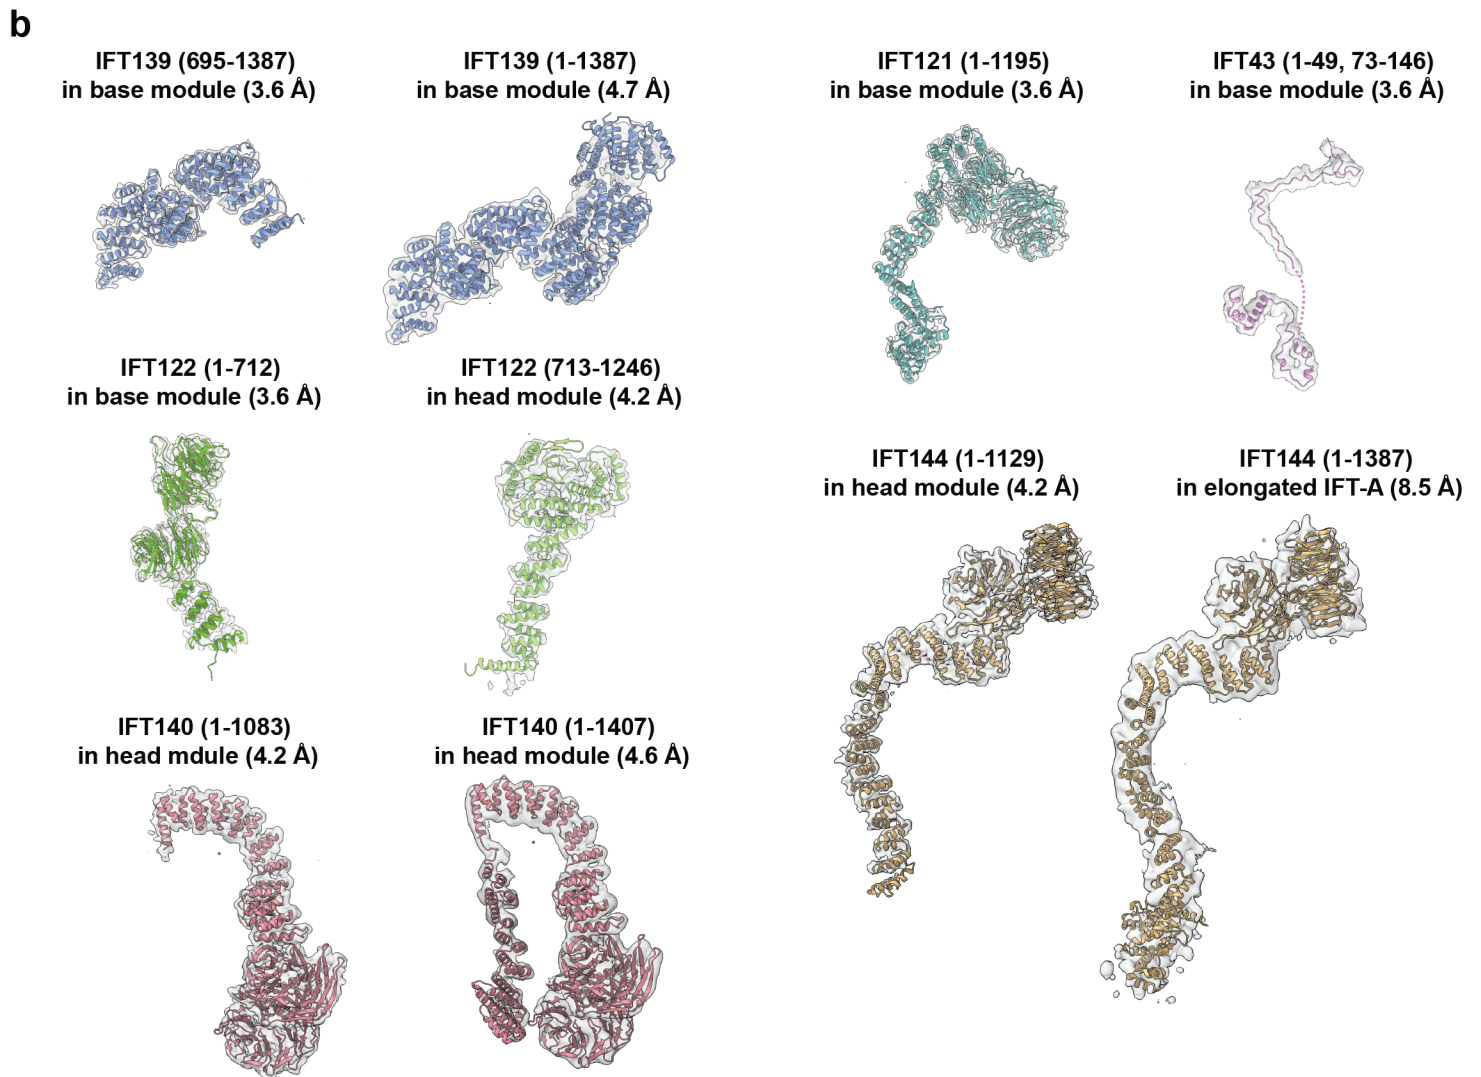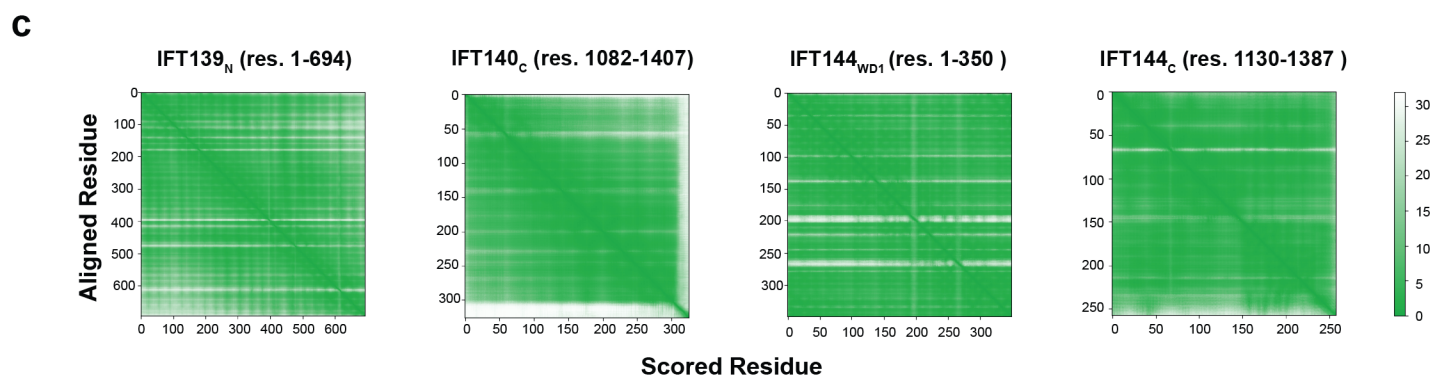

**Supplementary Fig. 4 | Cryo-EM density maps of the IFT-A complex. a,** High-resolution density maps of the head and base modules in two orthogonal views. The IFT-A components are colored and the color scheme is shown on the right. **b,** Cryo-EM density maps of the IFT-A subunits with the atomic models in cartoon representation. **c,** Predicted aligned error (PAE) plots of AlphaFold-2 predicted IFT139<sub>N</sub>, IFT140<sub>C</sub>, IFT144<sub>WD1</sub> and IFT144<sub>C</sub>.

# Supplementary Fig. 5

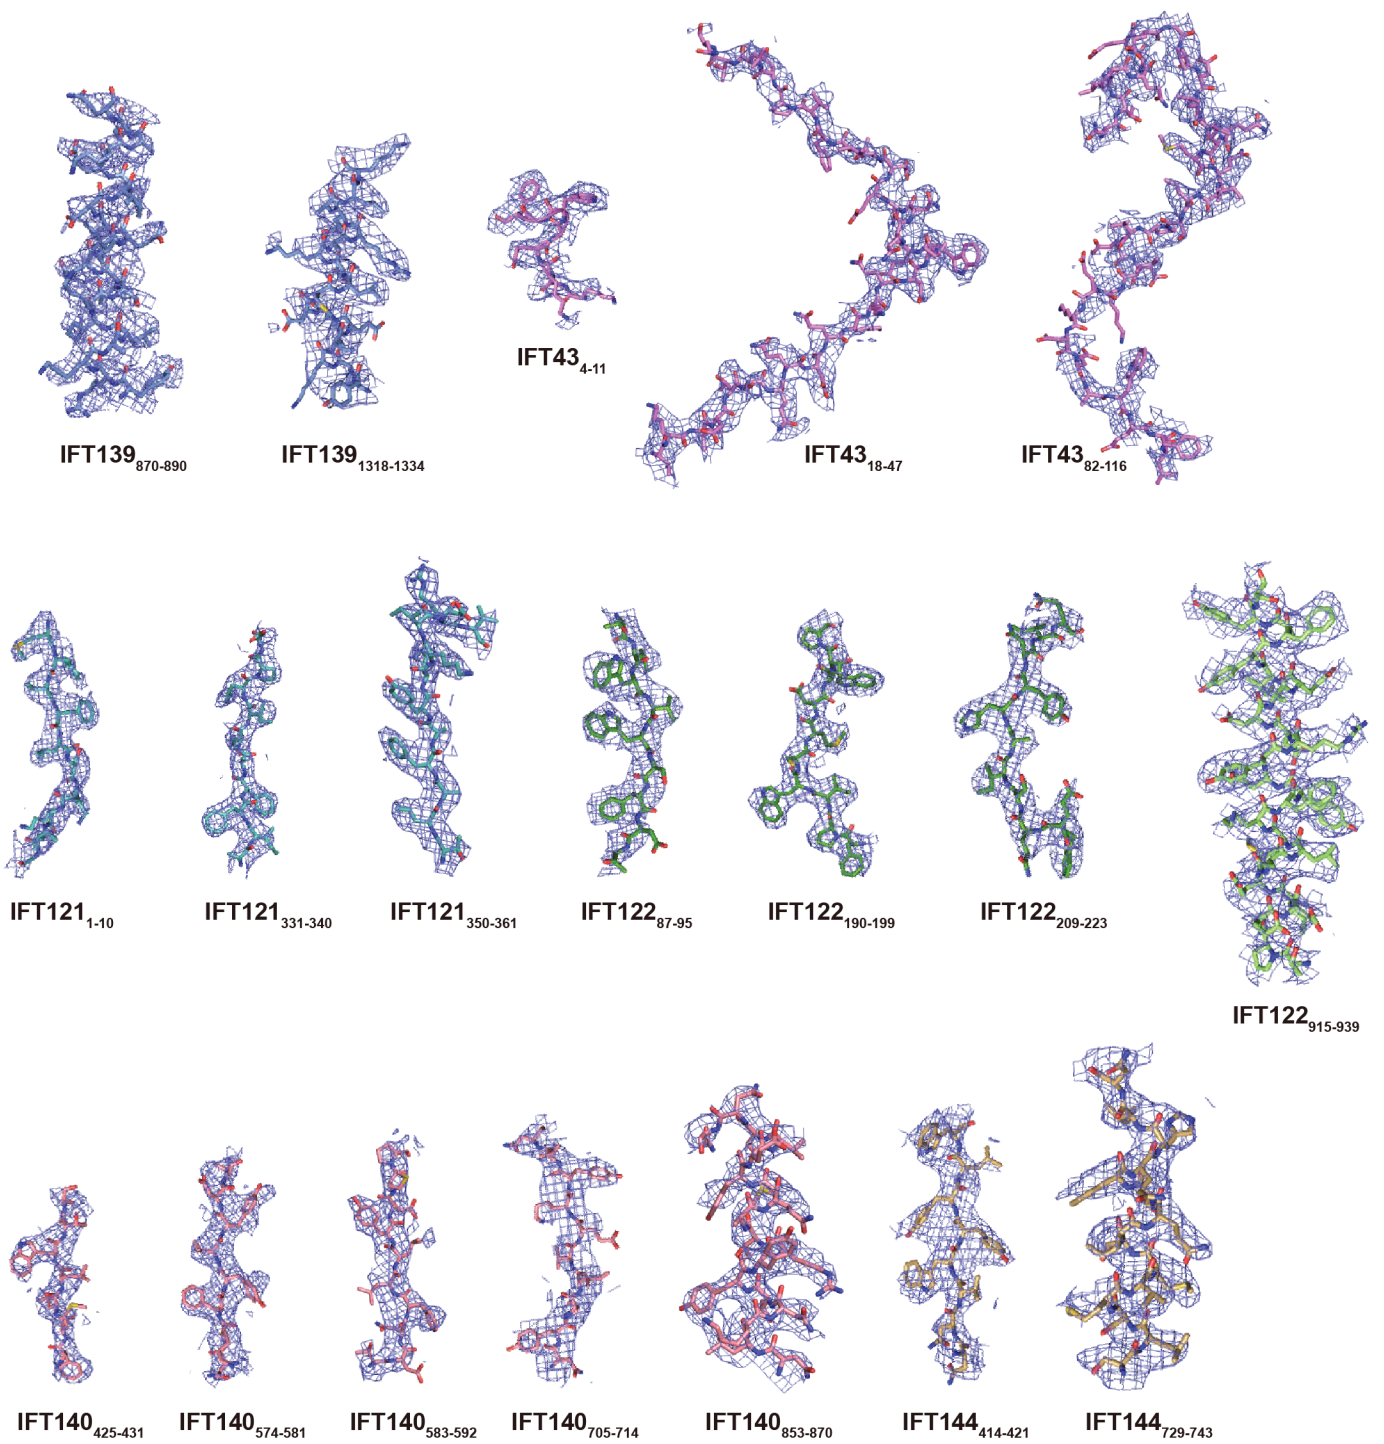

**Supplementary Fig. 5 | Representative cryo-EM density maps for the selected elements of each component of IFT-A.**



# Supplementary Fig. 6

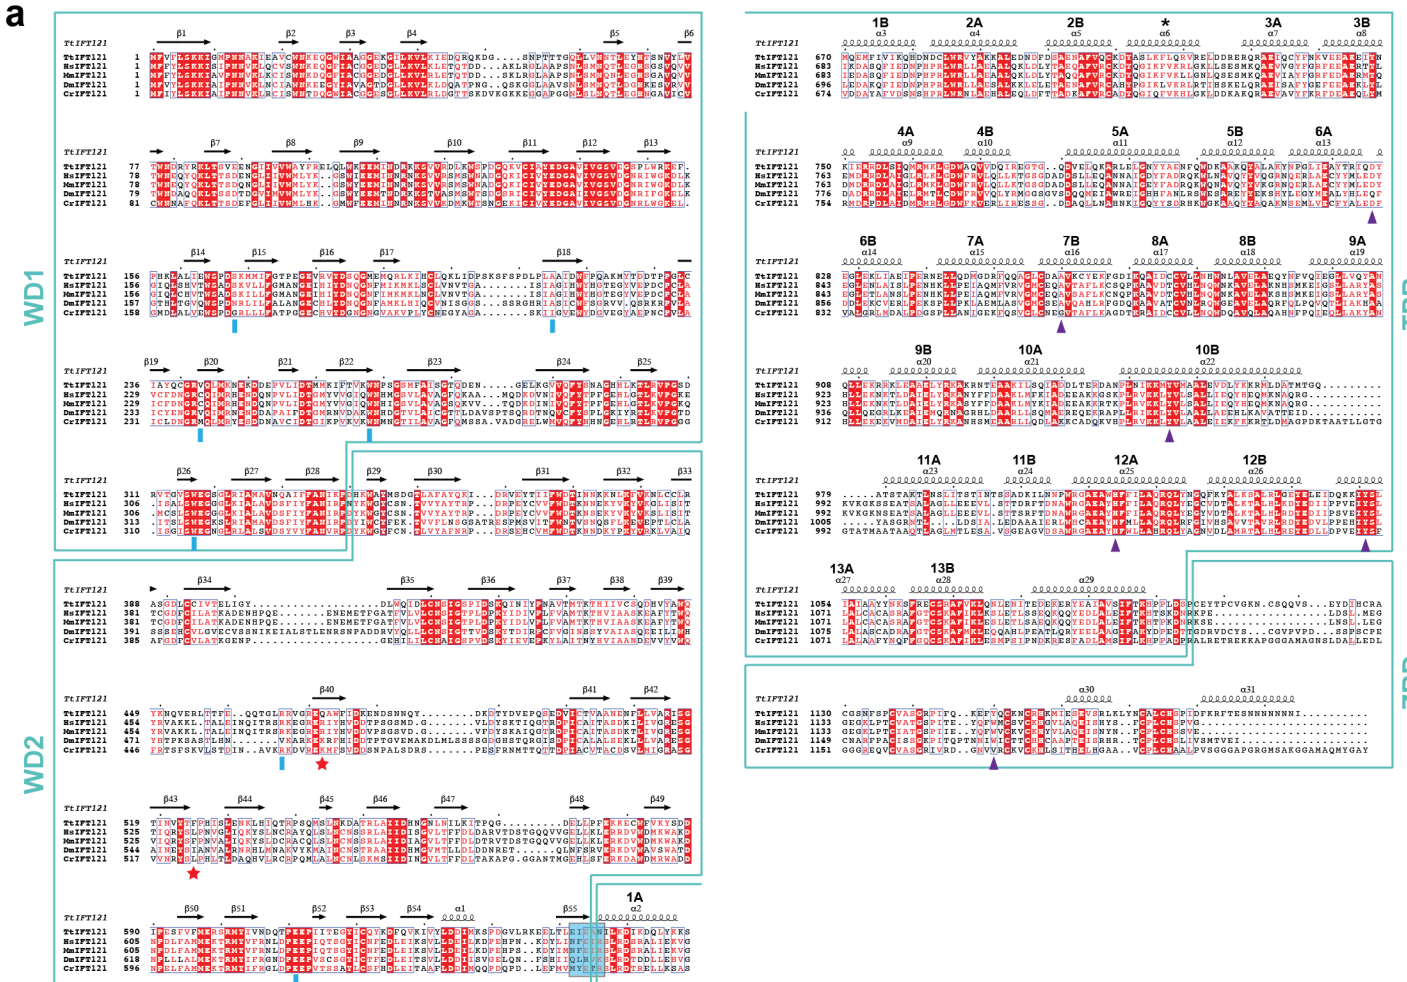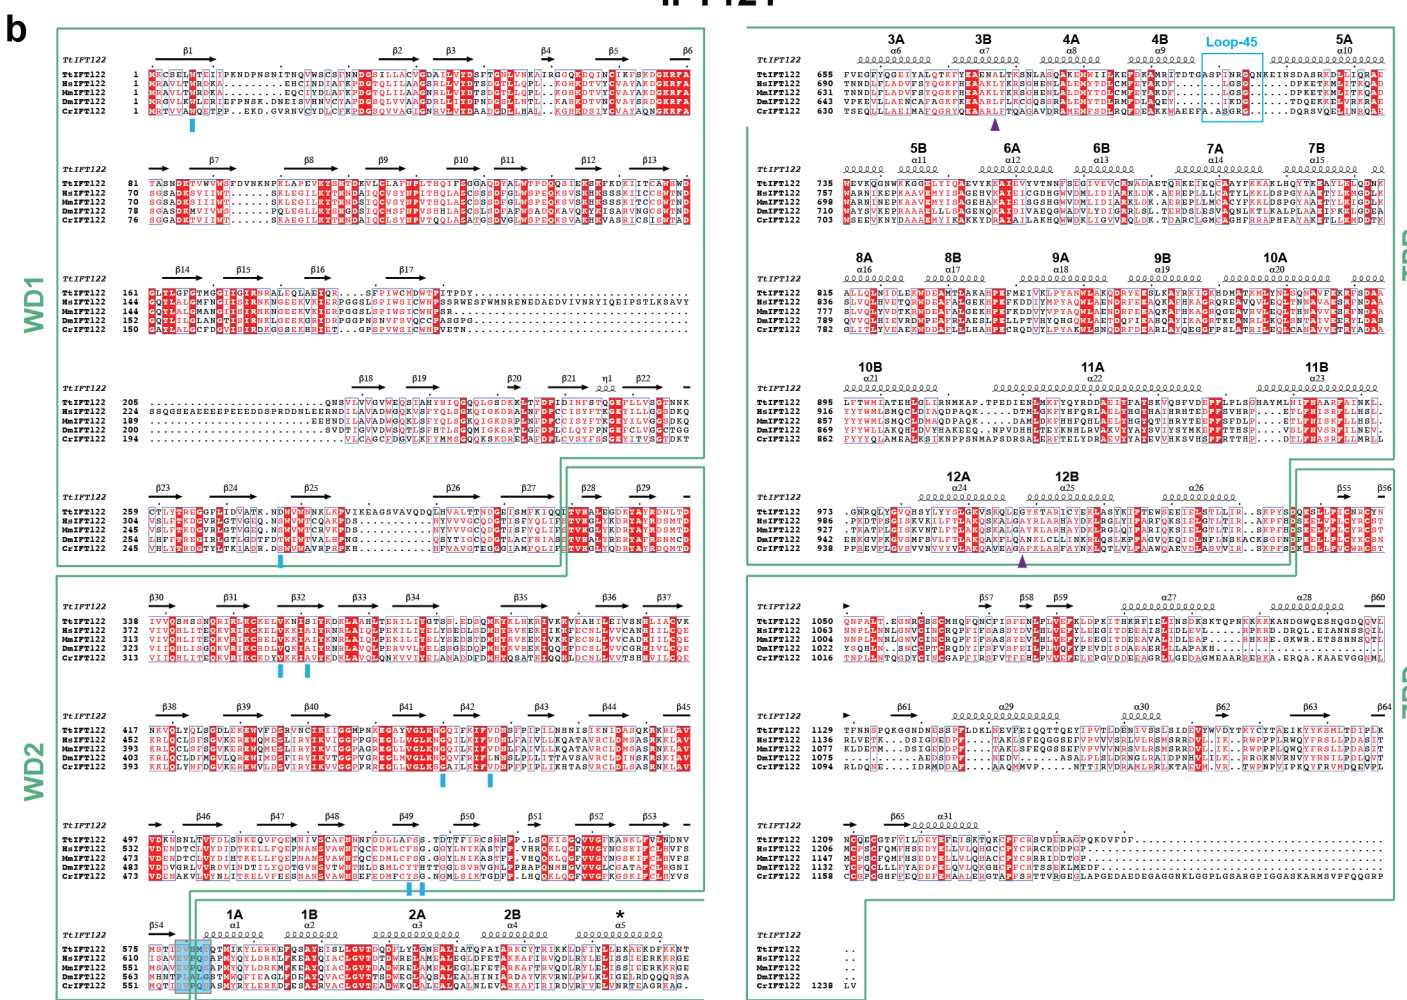

**IFT122**



# Supplementary Fig. 6

C

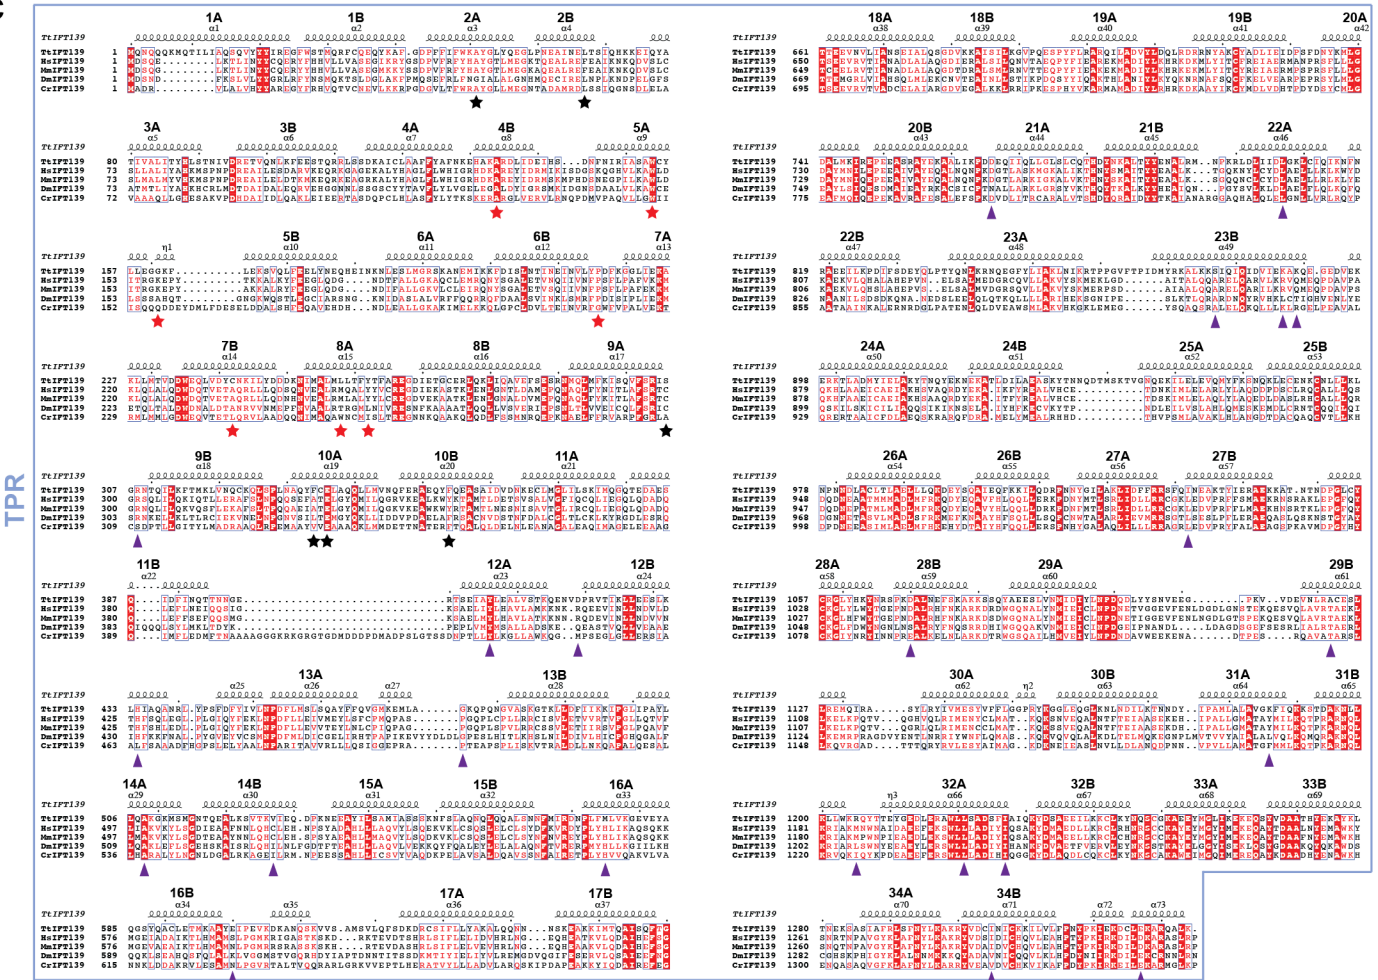

d

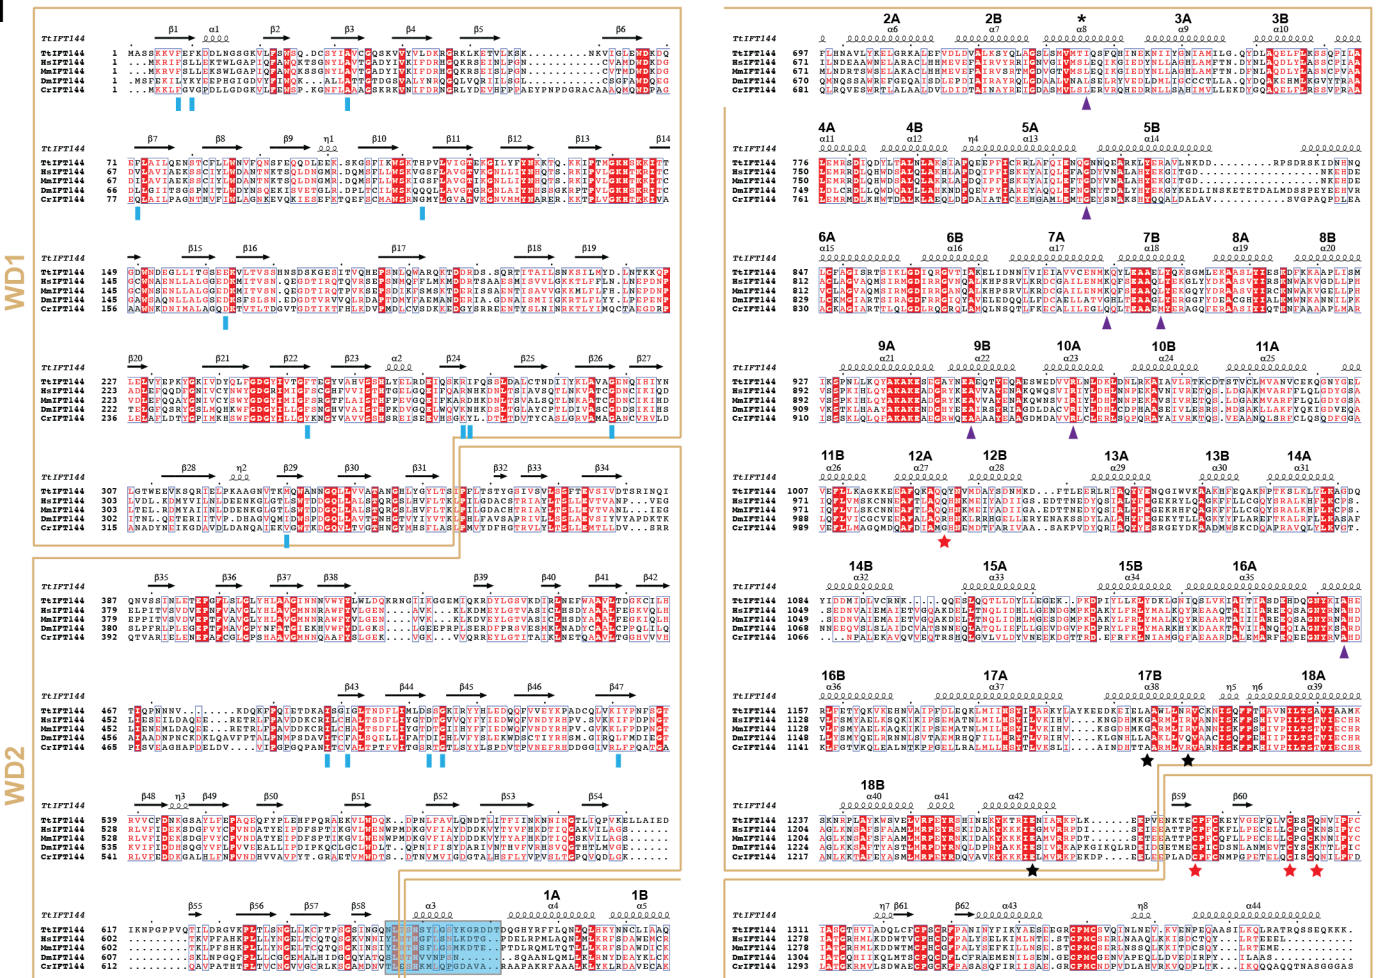

# Supplementary Fig. 6

e

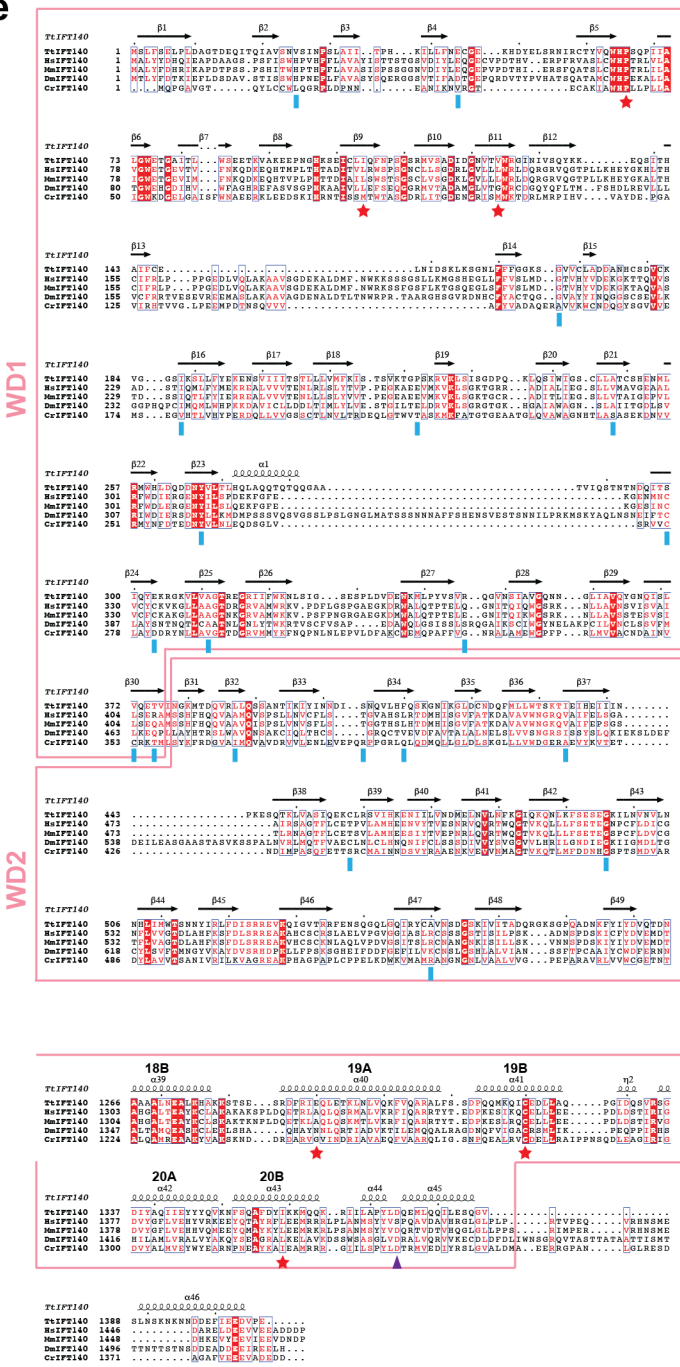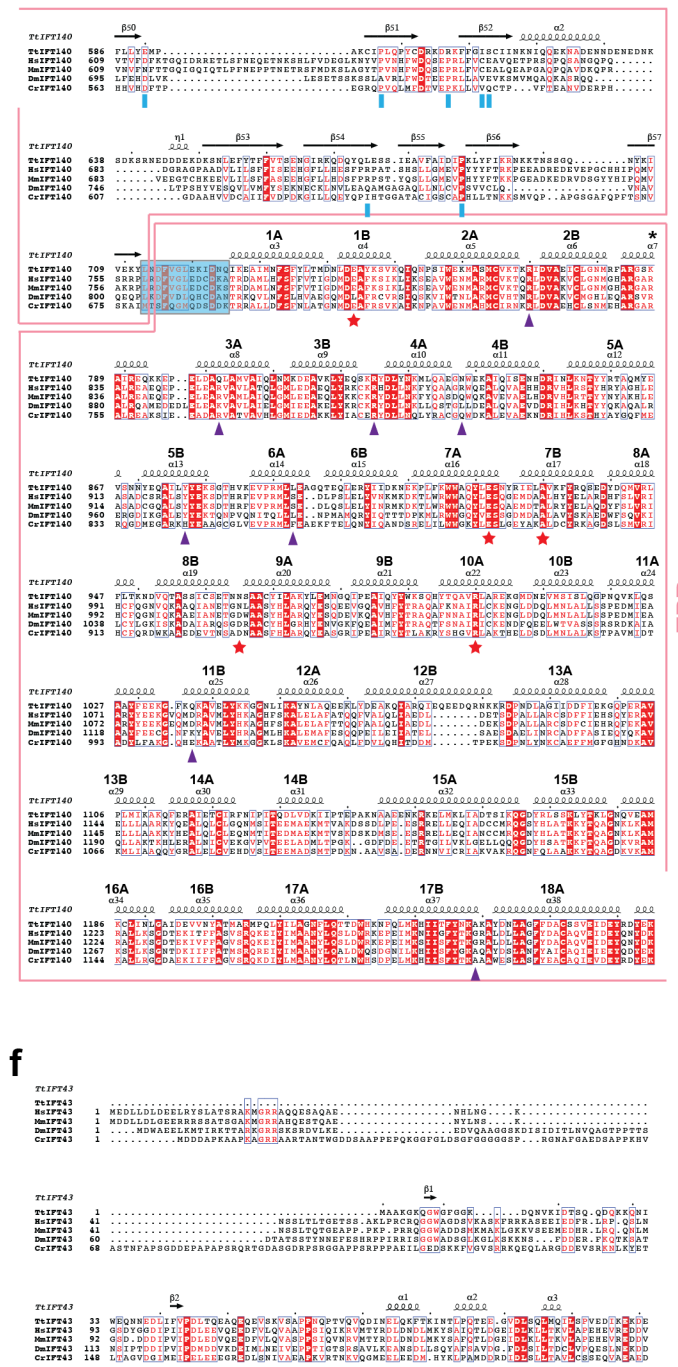

IFT140

IFT43

**Supplementary Fig. 6 | Multiple sequence alignment of the IFT-A components. a-f,**

Sequences of several representative organisms are used for alignment in IFT121 (**a**), IFT122 (**b**), IFT139 (**c**), IFT144 (**d**), IFT140 (**e**) and IFT43 (**f**). The short names Tt, Hs, Mm, Dm and Cr are the abbreviations of *Tetrahymena thermophila*, *Homo sapiens*, *Mus musculus*, *Drosophila melanogaster* and *Chlamydomonas reinhardtii*, respectively. **a**, Accession numbers used for IFT121 are as follows: Q22U89 (Tt), Q9P2L0 (Hs), Q8BND3 (Mm), Q9W097 (Dm) and A8JFR3 (Cr). **b**, Accession numbers used for IFT122 are as follows: Q244W3 (Tt), Q9HBG6 (Hs), Q6NWX3 (Mm), Q9VSI6 (Dm) and H9CTG6 (Cr). **c**, Accession numbers used for IFT139 are as follows: I7MFN3 (Tt), Q7Z4L5 (Hs), Q0HA38 (Mm), A0A0Q9X6X6 (Dm) and A9XPA6 (Cr). **d**, Accession numbers used for IFT144 are as follows: Q22BP2 (Tt), Q8NEZ3 (Hs), Q3UGF1 (Mm), A1ZBM3 (Dm) and A9XPA7 (Cr). **e**, Accession numbers used for IFT140 are as follows: I7LVZ7 (Tt), Q96RY7 (Hs), E9PY46 (Mm), Q7KTZ4 (Dm) and Q68K27 (Cr). **f**, Accession numbers used for IFT43 are as follows: Q22NF5 (Tt), Q96FT9 (Hs), Q9DA69 (Mm), Q9VK67 (Dm) and A8HYP5 (Cr). The two helices in each TPR motif are distinguished and labeled as helix A and B. Linkers between the WD and TPR domains of IFT122, IFT121, IFT144, IFT140 are highlighted in light blue shadows. The Loop-45 in IFT122 crucial for formation of the elongated and folded IFT-A complexes is highlighted with a cyan rectangle. Mutations that impair cargo binding, interactions of the components within IFT-A, interactions between IFT-As, or interactions between IFT-A and IFT-B are denoted by blue rectangles, purple triangles, red stars and black stars under the sequences, respectively.



## Supplementary Fig. 7

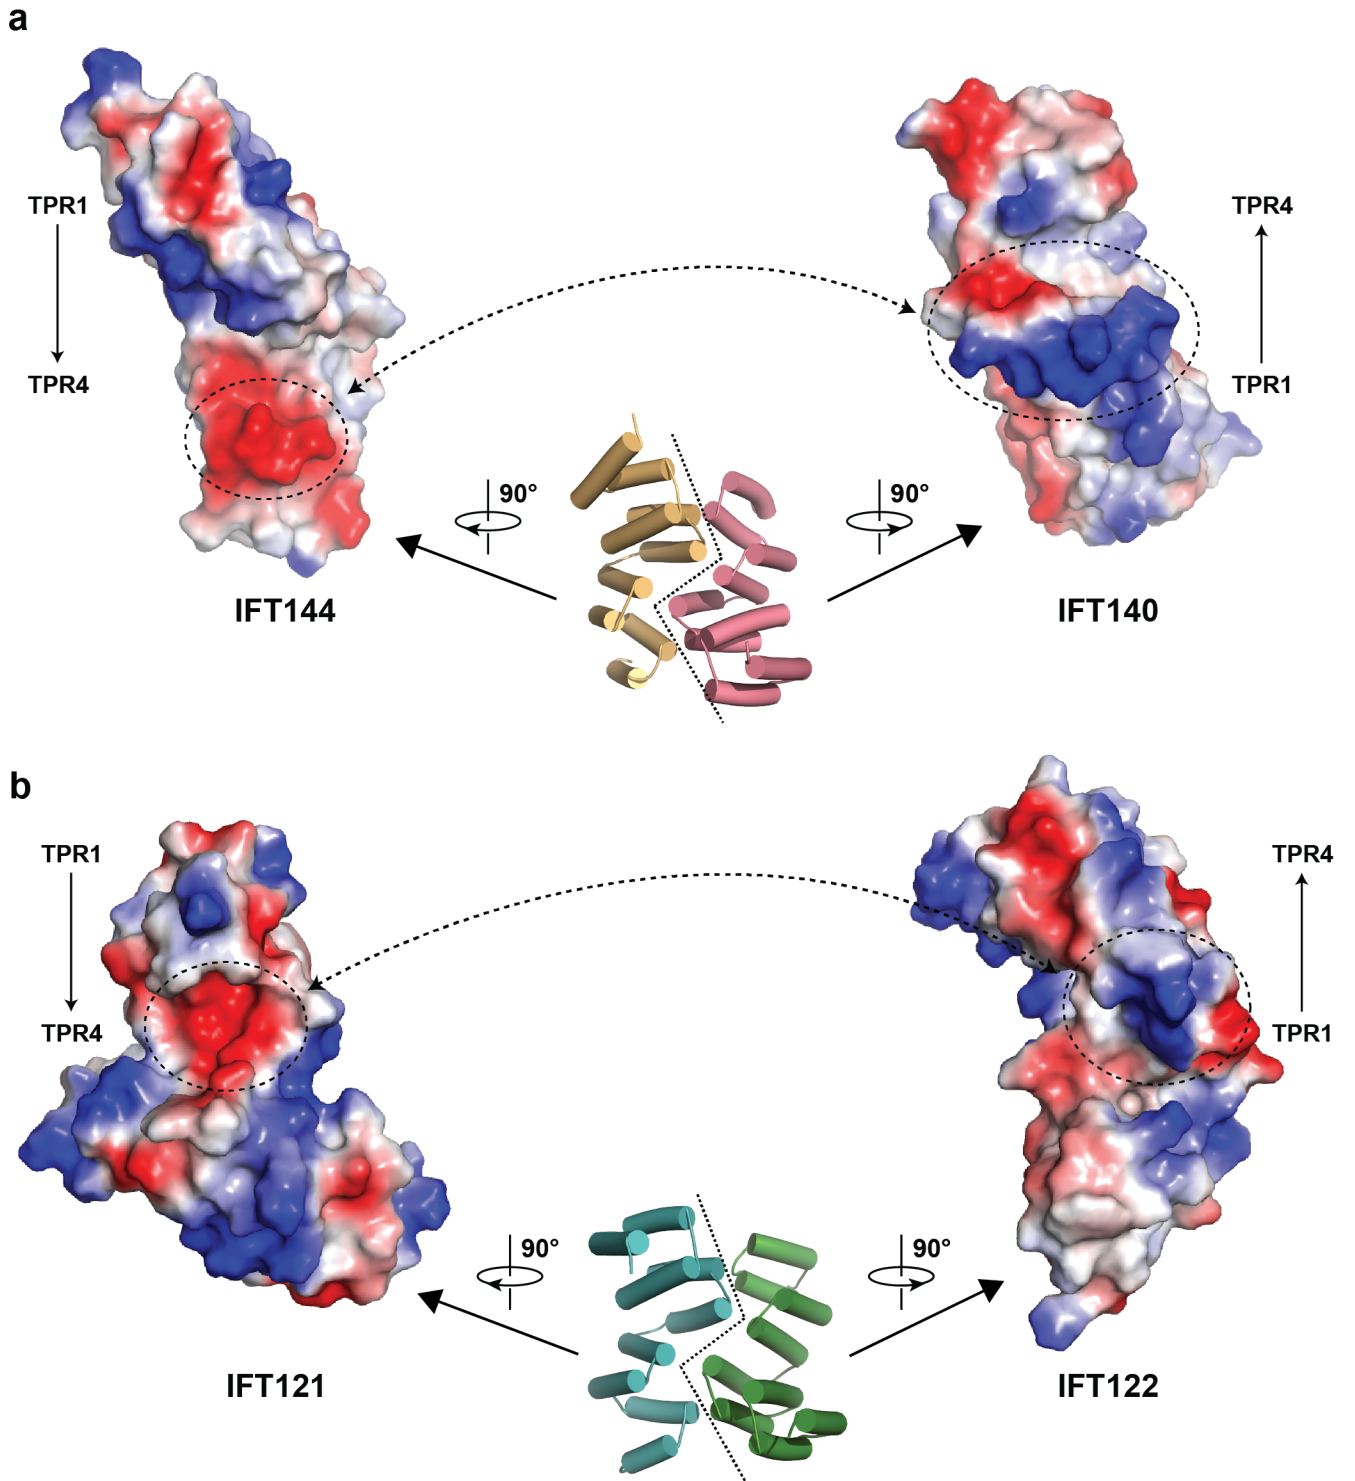

**Supplementary Fig. 7 | Electrostatic surface potential showing the interactions at the TPR junctions.** The opposite electrostatic surfaces important for the IFT144-IFT140 interaction **(a)** and the IFT122-IFT121 interaction **(b)** are highlighted in dashed circles. Positive potential, blue; negative potential, red.

## Supplementary Fig. 8

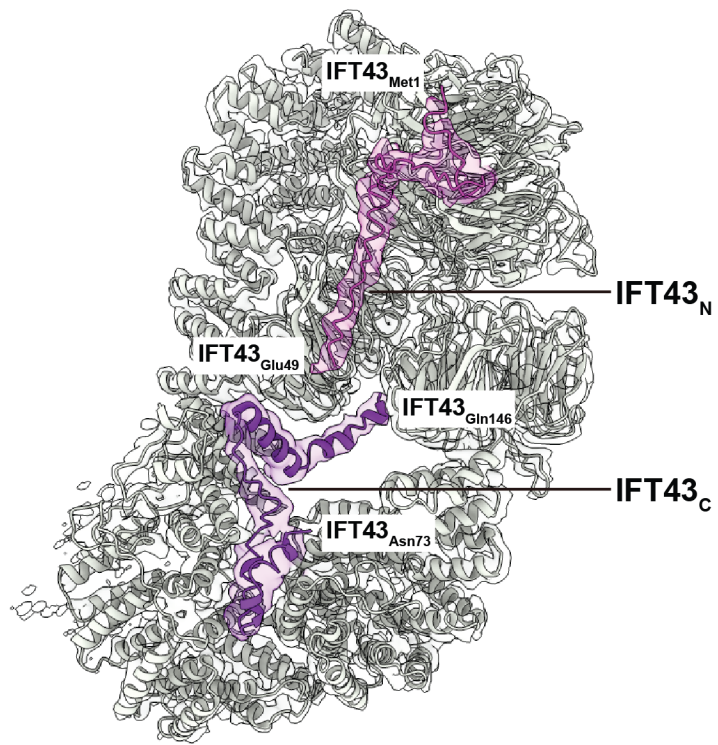

**Supplementary Fig. 8 | IFT43 in the base module.** Atomic models of IFT43<sub>N</sub> and IFT43<sub>C</sub> are colored in violet and purple respectively, while other IFT-A components and the density map of the base module in grey.

## Supplementary Fig. 9

a

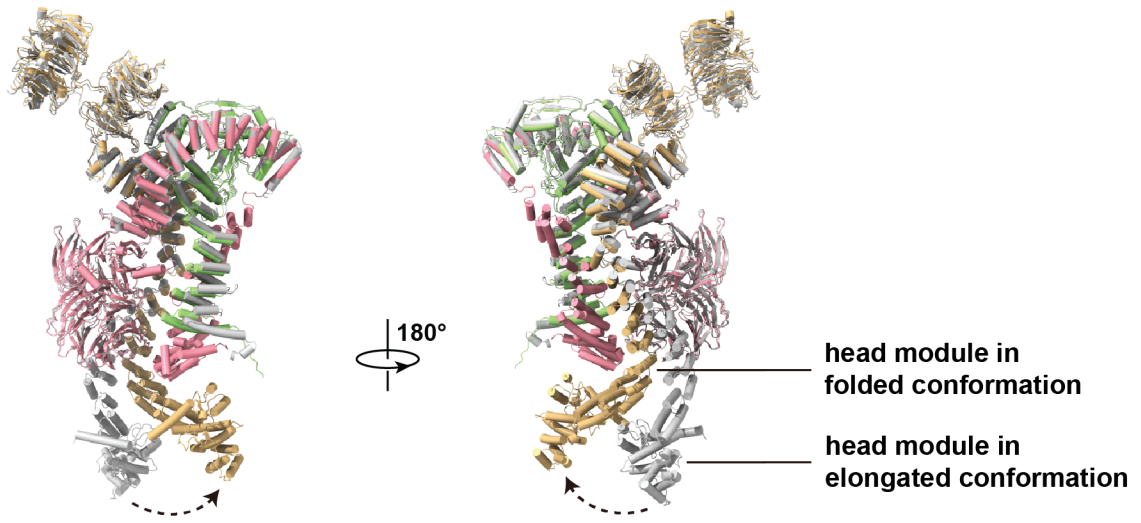

b

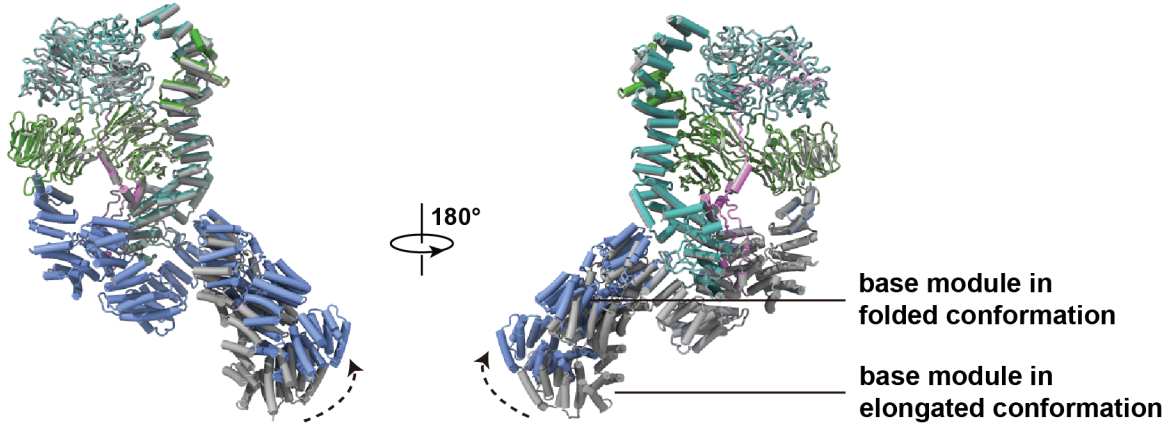



**Supplementary Fig. 9 | Structural alignment of the head and base modules. a-b,**

Two opposite views of the head **(a)** and base **(b)** modules. Proteins in the folded state are colored as Fig. 1a, and those in the elongated state in gray. The black arrows indicate the flex of IFT144<sub>C</sub> and IFT139<sub>N</sub>.

## Supplementary Fig. 10

**a**

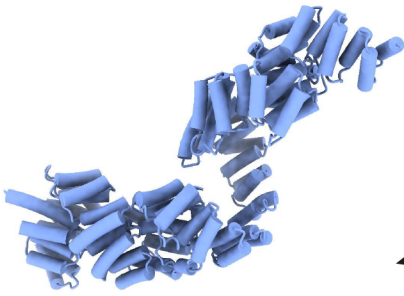

IFT139 in elongated IFT-A

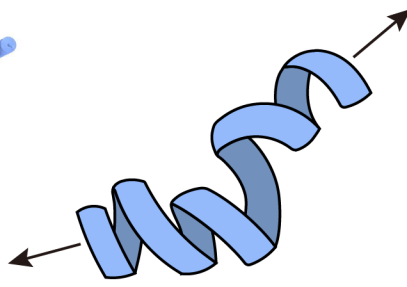

**b**

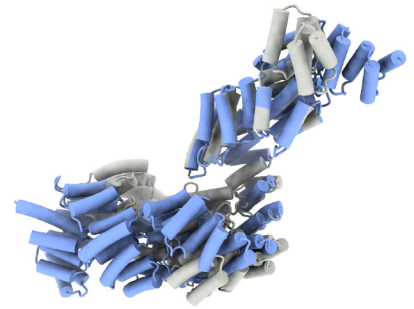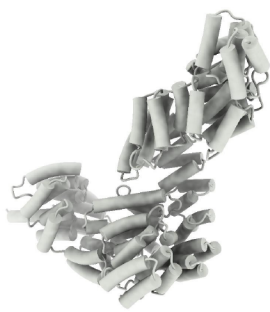

IFT139 in assembled IFT-A

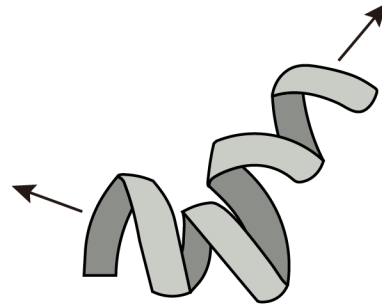

**Supplementary Fig. 10 | Twist in IFT139<sub>N</sub> during the incorporation of the elongated IFT-A complex into the anterograde train. a,** Cartoons and schematic diagrams showing the difference between solenoid structures of IFT139<sub>N</sub> in elongated state (light blue) and assembled state (gray) of the IFT-A complex. **b,** IFT139<sub>N</sub> is superimposed to compare the conformational changes in the two states in **(a)**.

## Supplementary Fig. 11

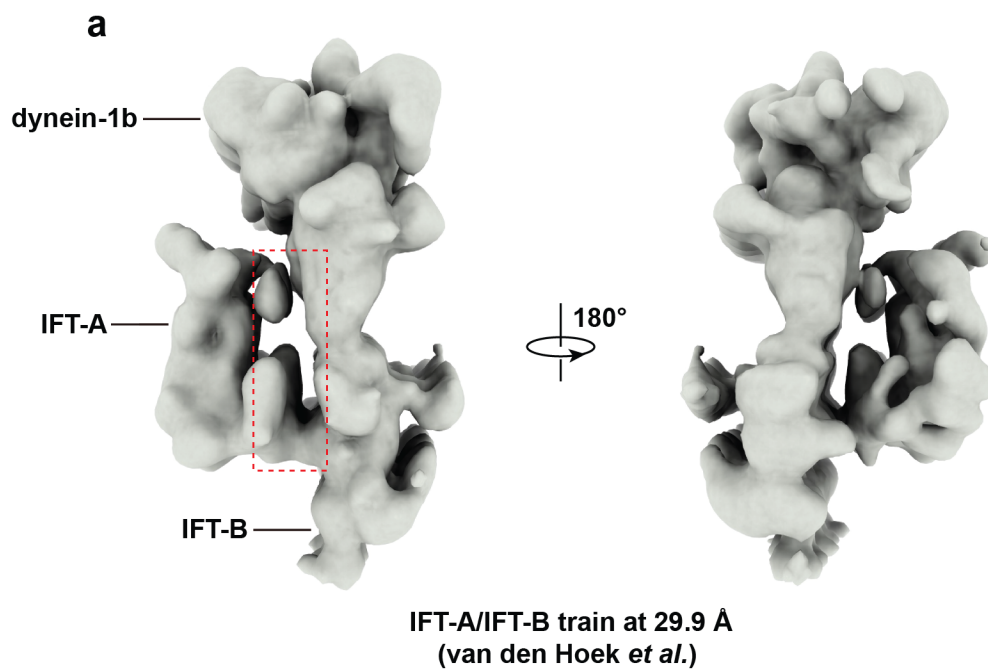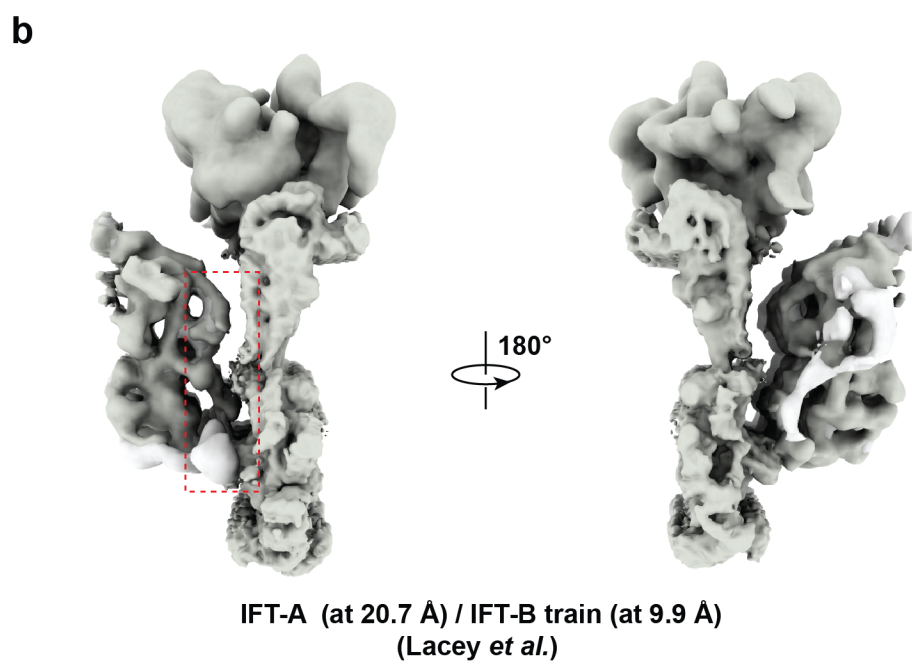

**Supplementary Fig. 11 | Interface between IFT-A and IFT-B in the anterograde train.** **a**, Low-resolution *Chlamydomonas* IFT train map (EMD-15261) at the ciliary transition zone. **b**, Composite map generated by fitting high-resolution structures of IFT-A and IFT-B (EMD-15980 and EMD-15977) into the anterograde IFT train map in (a). Dashed rectangles denote the interfaces between IFT-A and IFT-B.

# Supplementary Fig. 12

a

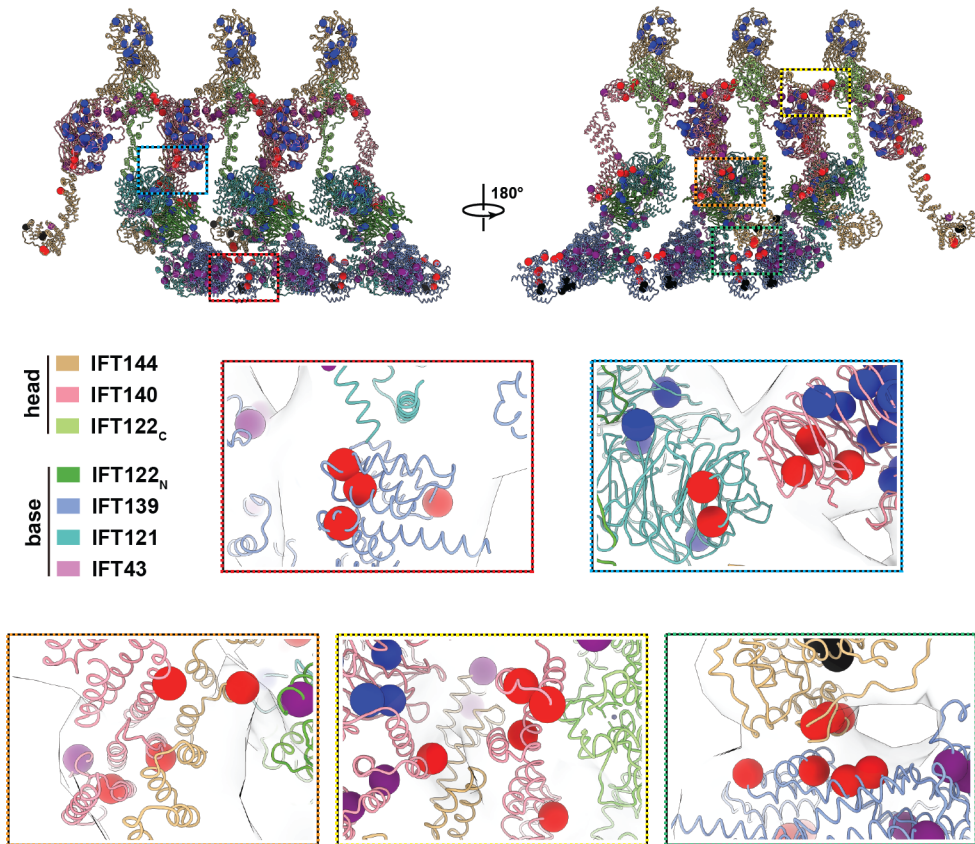

b

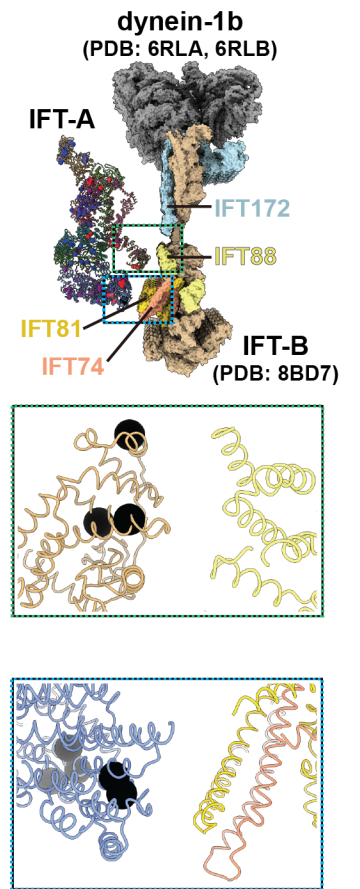

**Supplementary Fig. 12 | Enlarged views of mutations at type-II and -III interfaces.**

**a**, Human disease mutations are mapped onto the assembled IFT-A of anterograde trains.

Dashed boxes in colors indicate type-II mutations and closeup views of those mutations

at the interfaces are shown below. **b**, The [IFT-A]-[IFT-B] interfaces. Closeup views of

the type-III mutations at the [IFT-A]-[IFT-B] interfaces are shown below. Mutations of

type I-IV are shown in blue, red, black and purple dots, respectively.
