# Supplementary material for: Structural insight into the intraflagellar transport complex IFT-A and its assembly in the anterograde IFT train
Source: PubMed Central journal article supplement (PMC10023715; doi:10.1038/s41467-023-37208-2), 2023-03-17
Supplement: 41467_2023_37208_MOESM3_ESM.pdf [file 41467_2023_37208_MOESM3_ESM.pdf]

**File name: Supplementary Data 1**

**Description:** Mass spectrometry data of the purified IFT-A complex.

**File name: Supplementary Data 2**

**Description:** Registered pathogenic missense mutations in IFT-A components.

**File name: Supplementary Movie 1**

**Description:** The flexibility of the head and base modules in the elongated state with a broader angular distribution.

**File name: Supplementary Movie 2**

**Description:** Assembly of IFT-A in the anterograde train.
